# Supplementary material
Source: publisher site journal article supplement (https://www.dovepress.com/article/414079)
Supplement: Supplementary file 1 [file get_supplementary_file.php]

Supplementary Tables

Epidemiological characteristics of clinically isolated *Escherichia coli* from 2014 to 2022

**Table S1.** Distribution characteristics of *Escherichia coli* departments

| Department | Total (%)a | ESBLeco (%) | NESBLeco (%) | CReco (%) |
| --- | --- | --- | --- | --- |
| Neurology | **955(12.68)** | 352(8.42) | **603(17.98)** | 6(6) |
| Urology | 850(11.28) | **538(12.87)** | 312(9.30) | 8(8) |
| Endocrinology | 799(10.61) | 311(7.44) | 488(14.55) | - |
| ICU | 604(8.02) | 384(9.19) | 220(6.56) | **18(18)** |
| Nephrology | 491(6.52) | 272(6.51) | 219(6.53) | 6(6) |
| Pediatric Surgery | 483(6.41) | 252(6.03) | 231(6.89) | 2(2) |
| Neonatology | 382(5.07) | 263(6.29) | 119(3.55) | 10(10) |
| Pediatrics | 283(3.76) | 187(4.47) | 96(2.86) | 4(4) |
| Infectious Medicine | 282(3.74) | 164(3.92) | 118(3.52) | 2(2) |
| Gastrointestinal Surgery | 260(3.45) | 210(5.02) | 50(1.49) | 5(5) |
| Geriatrics | 246(3.27) | 128(3.06) | 118(3.52) | 2(2) |
| Cardiovascular Medicine | 194(2.57) | 85(2.03) | 109(3.25) | - |
| Respiratory Medicine | 168(2.23) | 97(2.32) | 71(2.12) | 4(4) |
| Gastroenterology | 158(2.10) | 100(2.39) | 58(1.73) | 2(2) |
| General Medicine | 121(1.61) | 66(1.58) | 55(1.64) | - |
| Neurosurgery | 126(1.67) | 86(2.06) | 40(1.19) | 6(6) |
| TCM | 111(1.47) | 60(1.44) | 51(1.52) | 1(1) |
| Hematology | 109(1.45) | 47(1.12) | 62(1.85) | 1(1) |
| Vascular Glandular Surgery | 103(1.37) | 80(1.91) | 23(0.69) | 1(1) |
| Orthopedic Surgery | 96(1.27) | 54(1.29) | 42(1.25) | 2(2) |
| Emergency department | 86(1.14) | 58(1.39) | 28(0.83) | 1(1) |
| Gynecology | 81(1.08) | 54(1.29) | 27(0.81) | - |
| Department of Rehabilitation Medicine | 80(1.06) | 49(1.17) | 31(0.92) | 2(2) |
| Hepatobiliary Surgery | 70(0.93) | 53(1.27) | 17(0.51) | - |
| Rheumatology Immunology | 58(0.77) | 37(0.89) | 21(0.63) | - |
| Dermatology | 54(0.72) | 27(0.65) | 27(0.81) | - |
| Trauma emergency surgery | 44(0.58) | 29(0.69) | 15(0.45) | - |
| Medical Oncology | 42(0.56) | 28(0.67) | 14(0.42) | 4(4) |
| Obstetric | 40(0.53) | 22(0.53) | 18(0.54) | - |
| other | 34(0.45) | 23(0.55) | 11(0.33) | 8(8) |
| Thoracic and Cardiovascular Surgery | 34(0.45) | 17(0.41) | 17(0.51) | - |
| Thoracic Surgery | 24(0.32) | 13(0.31) | 11(0.33) | 2(2) |
| Radiation Therapy | 21(0.28) | 11(0.26) | 10(0.30) | 1(1) |
| International Department of Medicine | 20(0.27) | 8(0.19) | 12(0.36) | 1(1) |
| Interventional department | 15(0.20) | 7(0.17) | 8(0.24) | 1(1) |
| Ear, nose and throat | 10(0.13) | 8(0.19) | 2(0.06) | - |

Non-ESBLeco, do not produce broad-spectrum β- Lactamase *Escherichia coli*; ESBLeco, Extended-Spectrum β-Lactamases-Producing *Escherichia coli*; CReco, carbapenem-resistant *Escherichia coli*.

a Sum of Non-ESBLeco and ESBLeco quantity.

The values that occupy the top percentage are displayed in bold.

**Table S2**. Annual resistance rate of *Escherichia coli* to 20 types of antibiotics.

| Antibiotics | Annual resistance rate of *Escherichia coli* (%) | | | | | | | | |
| --- | --- | --- | --- | --- | --- | --- | --- | --- | --- |
|  | 2014 | 2015 | 2016 | 2017 | 2018 | 2019 | 2020 | 2021 | 2022 |
| Ampicillin | 86.4 | 86.2 | 87.6 | 85 | 86.8 | 84.7 | 86 | 83.4 | 82.2 |
| Piperacillin | 76.8 | 74.8 | 76.2 | 77.7 | 81.8 | 78 | 76.5 | 71.2 | 69.5 |
| Amoxicillin/clavulanate | 85.2 | 82 | 83.8 | 81.6 | 85.6 | 79.3 | 78.4 | 78.2 | 60.3 |
| Ampicillin/sulbactam | 84.6 | 83.1 | 85.1 | 82.1 | 85.8 | 81.3 | 80.1 | 79.7 | 52.5 |
| Piperacillin/tazobactam | 12 | 15.2 | 18.7 | 14.2 | 15.4 | 16.3 | 13.2 | 13.2 | 9.1 |
| Cephazolin | 62.7 | 60.3 | 65.5 | 70.6 | 69.3 | 68.6 | 76.4 | 100 | 92.4 |
| Ceftazidime | 23 | 22.2 | 21.5 | 22 | 26.6 | 27.7 | 21.1 | 20.9 | 19.1 |
| Cefotaxime | 57.1 | 56.3 | 58.3 | 53.8 | 58.5 | 57.3 | 55.7 | 51.3 | 46.2 |
| Cefepime | 44.1 | 41.6 | 43.6 | 42.7 | 48.3 | 46 | 39.4 | 37.7 | 33.5 |
| Aztreonam | 32.8 | 33.2 | 33.8 | 34.2 | 40 | 38.6 | 32.3 | 31.9 | 31.2 |
| Imipenem | 0.6 | 0.7 | 0.5 | 1.1 | 1.1 | 1.8 | 0.9 | 1.1 | 1.2 |
| Meropenem | 0.4 | 0.9 | 0.8 | 0.8 | 1.3 | 1.7 | 1.3 | 1.2 | 1.1 |
| Amikacin | 4 | 2 | 4.2 | 3.3 | 2 | 3.1 | 2.8 | 1.9 | 2.5 |
| Gentamicin | 55.9 | 47.7 | 47.5 | 44.3 | 41.6 | 41 | 44.7 | 42.3 | 39.7 |
| Ciprofloxacin | 70.4 | 64.5 | 66.6 | 63.7 | 68.3 | 60.7 | 70.6 | 69.5 | 69.6 |
| Levofloxacin | 66.4 | 59.4 | 59 | 58.6 | 63.5 | 58.1 | 69.8 | 71 | 65.7 |
| Sulfamethoxazole | 68.6 | 64 | 64.6 | 64.4 | 68.5 | 61.4 | 86.3 | 72.7 | 73.3 |
| Colistin | 69.7 | 63 | 61.2 | 61.4 | 60.4 | 55.2 | 59.7 | 59.2 | 52.8 |
| Chloramphenicol | 1.2 | 1.3 | 1.1 | 1.7 | 1.3 | 1 | 3.1 | 83.3 | 0 |
| Tetracycline | 19.2 | 14 | 22.6 | 19 | 18.4 | 18.8 | 26.5 | 29 | 24.2 |

**Table S3.** Susceptibility characteristics of NESBL*eco* to 20 types of antibiotics.

| Antibiotics | Number | %R* | %I | %S | %R95%C.I. | MIC50 | MIC90 | MIC GM | MIC range |
| --- | --- | --- | --- | --- | --- | --- | --- | --- | --- |
| Ampicillin | 3371 | 67.7 | 0.9 | 31.4 | 66.1-69.3 | 32 | 32 | 13.58 | 2 - 64 |
| Piperacillin | 3347 | 50.8 | 11.7 | 37.5 | 49.1-52.5 | 128 | 128 | 25.64 | 2 - 128 |
| Amoxicillin/clavulanate | 3373 | 66.6 | 29 | 4.4 | 65.0-68.2 | 96 | 192 | 55.36 | 2 - 384 |
| Ampicillin/sulbactam | 3371 | 61.5 | 29.7 | 8.8 | 59.8-63.1 | 96 | 384 | 61.39 | 2 - 384 |
| Piperacillin/tazobactam | 3370 | 3.8 | 86.6 | 9.6 | 3.2-4.5 | 24 | 24 | 19.43 | 2 - 384 |
| Cephazolin | 1670 | 16 | 0 | 84 | 14.3-17.9 | 2 | 16 | 2.83 | 2 - 32 |
| Ceftazidime | 3373 | 0 | 0 | 100 | 0.0-0.1 | 0.5 | 0.5 | 0.51 | 0.5 - 4 |
| Cefotaxime | 3372 | 0 | 0 | 100 | 0.0-0.1 | 0.5 | 0.5 | 0.50 | 0.12 - 1 |
| Cefepime | 3368 | 0.6 | 0.4 | 99 | 0.4-0.9 | 1 | 1 | 1.02 | 0.12 - 32 |
| Aztreonam | 3372 | 0.6 | 0 | 99.4 | 0.4-0.9 | 1 | 1 | 1.01 | 0.25 - 32 |
| Imipenem | 3368 | 0.1 | 0.1 | 99.8 | 0-0.3 | 0.5 | 0.5 | 0.50 | 0.25 - 16 |
| Meropenem | 3365 | 0.2 | 0.1 | 99.8 | 0.1-0.4 | 0.5 | 0.5 | 0.50 | 0.06 - 16 |
| Amikacin | 3373 | 0.6 | 0 | 99.4 | 0.4-0.9 | 4 | 4 | 4.09 | 4 - 64 |
| Gentamicin | 3372 | 37.5 | 0.2 | 62.3 | 35.9-39.2 | 1 | 16 | 2.91 | 1 - 16 |
| Ciprofloxacin | 3362 | 53.7 | 0.2 | 46 | 52.0-55.4 | 1 | 4 | 1.01 | 0.01 - 4 |
| Levofloxacin | 3254 | 49.6 | 0.2 | 50.3 | 47.9-51.3 | 0.5 | 16 | 2.41 | 0.06 - 16 |
| Sulfamethoxazole | 3372 | 49.9 | 0 | 50.1 | 48.2-51.6 | 2 | >256 | 9.40 | 0.25 - >256 |
| Colistin | 1971 | 0.9 | 1 | 98.1a | 0.5-1.5 | 0.25 | 0.25 | 0.51 | 0.25 - 4 |
| Chloramphenicol | 2392 | 11.7 | 4.1 | 84.2 | 10.5-13.1 | 2 | 32 | 4.35 | 2 - 32 |
| Tetracycline | 3352 | 58.6 | 0.3 | 41.1 | 56.9-60.3 | 16 | 16 | 5.15 | 1 - 16 |

* R, resistance; I, intermediate; S, sensitivity; C.I., confidence interval; MIC, Minimum inhibitory concentration (unit, mg/L); GM, geometric mean(unit, mg/L).

a The Clinical and Laboratory Standards Institute (CLSI) has not reported a colistin "sensitive" clinical breakpoint, and this percentage is the value at which the MIC value for colistin is 0.25 mg/L, which is tentatively assigned to the "sensitive" category.

**Table S4.** Susceptibility characteristics of ESBLeco to 20 types of antibiotics.

| Antibiotics | Number | %R* | %I | %S | %R95%C.I. | MIC50 | MIC90 | MIC GM | MIC range |
| --- | --- | --- | --- | --- | --- | --- | --- | --- | --- |
| Ampicillin | 4200 | 97.6 | 0.2 | 2.2 | 97.1-98.0 | 32 | 32 | 30.29 | 2 - 64 |
| Piperacillin | 4182 | 94 | 2.7 | 3.2 | 93.2-94.7 | 128 | 128 | 112.20 | 2 - 128 |
| Amoxicillin-clavulanate | 4201 | 83.9 | 10.1 | 6 | 82.7-85.0 | 96 | 384 | 87.95 | 2 - 384 |
| Ampicillin/sulbactam | 4197 | 87.4 | 4.7 | 7.8 | 86.3-88.4 | 192 | 384 | 140.25 | 2 - 384 |
| Piperacillin/tazobactam | 4200 | 21.3 | 68.9 | 9.9 | 20.1-22.6 | 32 | >256 | 32.31 | 2 - 384 |
| Cephazolin | 3403 | 98.7 | 0 | 1.3 | 98.2-99.0 | 32 | 32 | 30.80 | 2 - 32 |
| Ceftazidime | 4151 | 40 | 14.1 | 45.9 | 38.5-41.5 | 8 | 32 | 5.48 | 0.5 - 32 |
| Cefotaxime | 4200 | 96.3 | 0 | 3.6 | 95.7-96.8 | 64 | 64 | 43.19 | 0.12 - 64 |
| Cefepime | 4186 | 72.7 | 16.3 | 10.9 | 71.3-74.0 | 32 | 32 | 15.39 | 0.12 - 32 |
| Aztreonam | 4194 | 60.2 | 12.4 | 27.4 | 58.7-61.7 | 16 | 32 | 10.72 | 0.25 - 128 |
| Imipenem | 4195 | 1.8 | 0.2 | 98 | 1.4-2.3 | 0.5 | 0.5 | 0.53 | 0.25 - 16 |
| Meropenem | 4195 | 1.8 | 0.1 | 98.1 | 1.4-2.3 | 0.5 | 0.5 | 0.53 | 0.06 - 16 |
| Amikacin | 4198 | 4.4 | 0.1 | 95.5 | 3.8-5.1 | 4 | 4 | 4.60 | 4 - 64 |
| Gentamicin | 4200 | 49.4 | 0.3 | 50.4 | 47.9-50.9 | 4 | 16 | 4.02 | 1 - 16 |
| Ciprofloxacin | 4193 | 77.3 | 0.1 | 22.6 | 76.0-78.6 | 4 | 4 | 2.00 | 0.015 - 4 |
| Levofloxacin | 4135 | 74.3 | 0.1 | 25.6 | 72.9-75.6 | 16 | 16 | 5.84 | 0.25 - 16 |
| Sulfamethoxazole | 4201 | 66.5 | 0 | 33.5 | 65.0-67.9 | >256 | >256 | 29.46 | 0.25 - >256 |
| Colistin | 2676 | 1.6 | 1.2 | 97.2a | 1.2-2.2 | 0.25 | 0.25 | 0.53 | 0.25 - 4 |
| Chloramphenicol | 3241 | 27.5 | 12.4 | 60.2 | 26.0-29.1 | 8 | 32 | 7.86 | 2 - 32 |
| Tetracycline | 4177 | 68.1 | 0.5 | 31.5 | 66.7-69.5 | 16 | 16 | 6.86 | 1 - 16 |

* R, resistance; I, intermediate; S, sensitivity; C.I., confidence interval; MIC, Minimum inhibitory concentration (unit, mg/L); GM, geometric mean(unit, mg/L).

a The Clinical and Laboratory Standards Institute (CLSI) has not reported a colistin "sensitive" clinical breakpoint, and this percentage is the value at which the MIC value for colistin is 0.25 mg/L, which is tentatively assigned to the "sensitive" category.

**Table S5.** Susceptibility characteristics of CR*eco* to 20 types of antibiotics.

| Antibiotics | Number | %R* | %I | %S | %R95%C.I. | MIC50 | MIC90 | MIC GM | MIC range |
| --- | --- | --- | --- | --- | --- | --- | --- | --- | --- |
| Ampicillin | 100 | 97 | 0 | 3 | 90.8-99.2 | 32 | 32 | 29.45 | 2 - 32 |
| Piperacillin | 100 | 91 | 3 | 6 | 83.2-95.5 | 128 | 128 | 98.36 | 2 - 128 |
| Amoxicillin/clavulanate | 100 | 96 | 4 | 0 | 89.5-98.7 | 384 | 384 | 199.89 | 21 - 384 |
| Ampicillin/sulbactam | 100 | 95 | 4 | 1 | 88.2-98.1 | 384 | 384 | 204.40 | 16 - 384 |
| Piperacillin/tazobactam | 100 | 80 | 19 | 1 | 70.6-87.1 | >256 | >256 | 379.31 | 2 - >256 |
| Cephazolin | 77 | 97.4 | 0 | 2.6 | 90.1-99.5 | 32 | 32 | 29.78 | 2 - 32 |
| Ceftazidime | 100 | 83 | 4 | 13 | 73.9-89.5 | 32 | 32 | 18.13 | 0.5 - 32 |
| Cefotaxime | 100 | 91 | 1 | 8 | 83.2-95.5 | 64 | 64 | 37.53 | 0.5 - 64 |
| Cefepime | 100 | 86 | 3 | 11 | 77.3-91.9 | 32 | 32 | 20.54 | 1 - 32 |
| Aztreonam | 99 | 59.6 | 3 | 37.4 | 49.2-69.2 | 32 | 32 | 9.27 | 1 - 32 |
| Imipenem | 97 | 87.6 | 2.1 | 10.3 | 79.0-93.1 | 16 | 16 | 9.16 | 0.5 - 16 |
| Meropenem | 98 | 87.8 | 0 | 12.2 | 79.3-93.3 | 16 | 16 | 7.94 | 0.5 - 16 |
| Amikacin | 100 | 12 | 1 | 87 | 6.6-20.4 | 4 | 64 | 5.78 | 4 - 64 |
| Gentamicin | 100 | 61 | 0 | 39 | 50.7-70.4 | 16 | 16 | 5.58 | 1 - 16 |
| Ciprofloxacin | 100 | 78 | 0 | 22 | 68.4-85.4 | 4 | 4 | 2.10 | 0.25 - 4 |
| Levofloxacin | 96 | 78.1 | 0 | 21.9 | 68.3-85.6 | 16 | 16 | 6.68 | 0.5 - 16 |
| Sulfamethoxazole | 100 | 61 | 0 | 39 | 50.7-70.4 | >256 | >256 | 19.99 | 0.25 - >256 |
| Colistin | 65 | 9.2 | 3.1 | 87.7a | 3.8-19.6 | 0.25 | 1 | 0.34 | 0.25 - 4 |
| Chloramphenicol | 82 | 50 | 4.9 | 45.1 | 38.8-61.2 | 16 | 32 | 12.42 | 2 - 32 |
| Tetracycline | 100 | 71 | 1 | 28 | 60.9-79.4 | 16 | 16 | 7.73 | 1 - 16 |

* R, resistance; I, intermediate; S, sensitivity; C.I., confidence interval; MIC, Minimum inhibitory concentration (unit, mg/L); GM, geometric mean(unit, mg/L).

a The Clinical and Laboratory Standards Institute (CLSI) has not reported a colistin "sensitive" clinical breakpoint, and this percentage is the value at which the MIC value for colistin is 0.25 mg/L, which is tentatively assigned to the "sensitive" category.

Supplementary Figure





Figure S1. Distribution characteristics of the minimum inhibitory concentrations of 20 antibacterial drugs against *Escherichia coli*:(A-T) amoxicillin-clavulanate; ampicillin/sulbactam; piperacillin; piperacillin/tazobactam; moxifloxacin; aztreonam; cephazolin; ceftazidime; cefotaxime; cefepime; imipenem; meropenem; colistin; sulfamethox-azole; chloramphenicol; gentamicin; amikacin; ciprofloxacin; levofloxacin; tetra-cycline. *:The minimum inhibitory concentration (MIC) for sensitive, intermediate, and resistant strains is indicated by the range or a specific value enclosed in parentheses (*).
